# Supplementary material for: A Tale of Two States: Do Consumers See Mental Health Insurance Parity When Shopping on State Exchanges?
Source: Atypon-hosted journal article supplement (doi:10.1176/appi.ps.201400582), 2015-03-02
Supplement: appi.ps.201400582.ds001.pdf [file appi.ps.201400582.ds001.pdf]

*Exhibit: Selected examples of apparent discrepancies in application of federal parity in health plans offered on two state exchanges*

|   | Exemplar language in exchange plans' summary documents                                                                                             |                                                                                   | Concerns for parity regulation                                                        |
|---|----------------------------------------------------------------------------------------------------------------------------------------------------|-----------------------------------------------------------------------------------|---------------------------------------------------------------------------------------|
|   | Medical/Surgical Benefits                                                                                                                          | Behavioral Health Benefits                                                        |                                                                                       |
| 1 | <i>Inpatient stay requires copayment</i>                                                                                                           | <i>Inpatient stay requires coinsurance</i>                                        | Discrepancy in type of financial requirement imposed                                  |
| 2 | <i>No charge for a combined total of 3 primary care or outpatient mental health care visits; additional visits are no charge after deductible.</i> | <i>No charge after deductible for substance use disorder outpatient services.</i> | Discrepancy in generosity of mental health and medical versus substance abuse benefit |
| 3 | <i>Medical office visit requires \$30 copay. Outpatient surgery requires 30% coinsurance.</i>                                                      | <i>All behavioral health visits requires 30% coinsurance.</i>                     | Discrepancy in subdivision of behavioral health benefit                               |
| 4 | <i>For outpatient visits, no limitations and exceptions</i>                                                                                        | <i>For outpatient visits, prior authorization is required</i>                     | Discrepancy in use of NQTLs                                                           |
